# Supplementary material for: Role of the PPAR pathway in atrial fibrillation associated with heart valve disease: transcriptomics and proteomics in human atrial tissue
Source: PubMed Central journal article supplement (PMC6971265; doi:10.1038/s41392-019-0093-2), 2020-01-17
Supplement: 41392_2019_93_MOESM1_ESM.pdf [file 41392_2019_93_MOESM1_ESM.pdf]

## Supplementary Materials for

### Role of PPAR Pathway in Atrial Fibrillation Associated with Heart Valvular Disease: Transcriptomics and Proteomics in the Human Atrial Tissue

Huan-Xin Chen<sup>1\*</sup>, Ming-Yang Li<sup>1,2\*</sup>, Yi-Yao Jiang<sup>1\*</sup>, Hai-Tao Hou<sup>1</sup>, Jun Wang<sup>1</sup>, Xiao-Cheng Liu<sup>1</sup>, Qin Yang<sup>1</sup>, Guo-Wei He<sup>1,3,4†</sup>

Correspondence to: gwhezj@163.com

#### **This PDF file includes:**

Materials and Methods

Figures. S1

Tables S1 to S2

## **Materials and Methods**

### Transcriptomics analysis

The transcriptomics analysis was performed in the atrial tissue. Five tissue samples from 3 AF patients and 2 SR patients were divided into left atrial tissue group (LA, n=3) and right atrial tissue group (RA, n=3) in the AF patients and right atrial tissue in SR patients (n=2). Tissues from LA and RA in the AF group were obtained from the same patient. Total RNA was extracted from the tissue using TRIzol reagent (Invitrogen, Burlington, ON, Canada) and digested with DNase I (Takara, Dalian, China) according to the manufacturer's protocol. Next, Oligo (dT) magnetic beads were used to isolate mRNA from the total RNA. By mixing with fragmentation buffer, the mRNA was then broken into short fragments. The cDNA was synthesized using the mRNA fragments as templates. The short fragments were purified and resolved with EB buffer for end repair and single nucleotide A (adenine) addition, and then connected with adapters. Suitable fragments were selected for PCR amplification as templates. During the quality control steps, an Agilent 2100 Bioanalyzer (Agilent Technologies, Redwood City, CA, USA) and ABI StepOnePlus Real-Time PCR System (Life Technologies, Grand Island, NY, USA) were used for quantification and qualification of the sample library. Each cDNA library was sequenced in a single lane of the Illumina HiSeq™ 2000 system using paired end protocols according to the manufacturer's instructions at BGI.

### Proteomics analysis

A discovery-validation workflow was used in the proteomics analysis. Isobaric tags for relative and absolute quantitation (iTRAQ) technology was used for the proteomics study. Because there are 8 Isobaric tags (m/z113,114,115,116,117,118, 119 and 121), the plasma samples from 24 patients were divided into 6 groups (3 AF group and 3 SR group), each of these groups contained the plasma from 4 patients. In addition, plasma samples from 12 AF or 12 SR patients were used

as control groups, respectively. Thus, the 8 Isobaric tags were concomitantly labeled in the plasma samples for the iTRAQ study.

In the iTRAQ study for atrial tissue, the samples were allocated into groups as described in the transcriptomics study.

In the validation phase, identified differential proteins were validated in a larger study population using enzyme-linked immunosorbent assays (ELISA) in plasma samples.

#### Protein digestion and iTRAQ labeling

Protein (100 ug) from each sample was precipitated by cold acetone at  $-20^{\circ}\text{C}$  for 1 hour and then centrifuged at 12000rpm for 15 minutes, after which the deposit was collected and dissolved with 50 ul dissolution buffer. Proteins in the solution were reduced (4ul reducing reagent,  $60^{\circ}\text{C}$  for 1 hour), alkylated (2ul cysteine-blocking reagents, room temperature for 10 minutes), digested (50ul sequencing-grade trypsin ( $50\text{ng}/\mu\text{L}$ ),  $37^{\circ}\text{C}$  for 12 hours) and centrifuged at 12000rpm for 20 minutes. Following digestion with trypsin, iTRAQ reagent (AB SCIEX, Framingham, MA, USA) was added and each sample was labeled with a unique iTRAQ tag (m/z113,114,115,116,117,118,119 and 121).

#### 2D-LC-MS/MS analysis

The peptides were dried in a vacuum freeze dryer and re-suspended in 100ul of buffer A. Reversed-phase liquid chromatography (RPLC) was used to fractionate sample on the Agilent 1200 HPLC system (Agilent) equipped with HPLC column (Narrow-Bore  $2.1*150\text{ mm } 5\mu\text{m}$ , Agilent). A total of 10 segments were collected at a rate of  $0.3\text{ml}/\text{min}$  using a nonlinear binary gradient starting with buffer A and transitioning to buffer B. The fractions were dried in a vacuum freeze dryer and re-dissolved in nano-RPLC buffer A. Each segment was loaded on a Eksigent nanoLC-Ultra™ 2D System (AB SCIEX) mounted with a C18 nanoLC trap column

(100  $\mu\text{m}$   $\times$  3 cm, C18, 3  $\mu\text{m}$ , 150  $\text{\AA}$ ) and separated over a 70 min acetonitrile gradient from 5 to 35% in 0.1% formic acid combined with a Triple TOF 5600 System (AB SCIEX, USA) fitted with a Nanospray III source (AB SCIEX, USA). Data were acquired using an ion spray voltage of 2.5 kV, curtain gas of 30 PSI, nebulizer gas of 5 PSI, and an interface heater temperature of 150  $^{\circ}\text{C}$ .

#### iTRAQ data analysis and bioinformatics analysis

After data pre-processing, standardization, and quality control, the original data were screened for reliable peptides and proteins. Identification of peptides from tandem mass spectrometry (MS) was achieved using the Protein Pilot Software v.5.0 (AB SCIEX, USA) against Uniprot\_Homo Sapiens Database to match the theory data in order to obtain result of protein identification. The criteria for differential proteins were established as: 1) Unique peptide  $\geq 1$ , apart from invalid values and anti-library data; 2) Fold change  $> 1.2$  or  $< 0.83$ ; and 3) P value  $< 0.05$  (T-test for repeated data for over three times). Proteins fulfilling these criteria were considered to have significant difference in expression between the two groups.

A list of differential proteins identified was implemented on the on-line software DAVID Bioinformatics Resources 6.8 (NIH) for Gene Ontology (including biological process, molecular function and cellular component) function and enrichment analysis. Kyoto Encyclopedia of Genes and Genomes (KEGG) pathway database and STRING database were used to perform pathway analysis and protein-protein interaction analysis.

#### Data processing and bioinformatics analysis

ChromaTOF software and Fiehn database were used to process the raw data and provide qualitative information about the metabolites. Data were normalized by total peak area of each sample using Excel 2007 and imported into SIMCA-P software (version 14.0, Umetrics, Umeå, Sweden) for multivariate statistical analysis. Principal component analysis (PCA) was used to visualize the general distribution of samples and the stability of the whole analysis process.

Partial least-squares discriminant analysis (PLS-DA) and orthogonal partial least-squares discriminant analysis (OPLS-DA) were used to distinguish the differences of general metabolic profiling between different patient groups. To avoid model overfitting, a default of seven rounds of cross-validation in SIMCA-P software was applied. Moreover, OPLS-DA models were validated by a permutation analysis with 200 times. Differential metabolites were selected according to variable importance in projection (VIP) values >1 in OPLS-DA model as well as P-values <0.05 in Student's test. KEGG pathway database was used to generate significant pathways in metabolomics dataset.

#### Creation of pathway maps

All the omics data including transcriptomics, proteomics, and metabolomics data were used to compare proteins/enzymes with metabolic pathways. Quantitative changes of individual metabolites and proteins as compared with control samples were calculated and graphed by using the KEGG mapping tools. In particular, by combining proteomics with metabolomics data, we were able to identify the common pathways involved in atrial fibrillation.

**Figure. S1. The differential expression in PPAR pathway in atrial tissues: The overview of PPAR pathway**

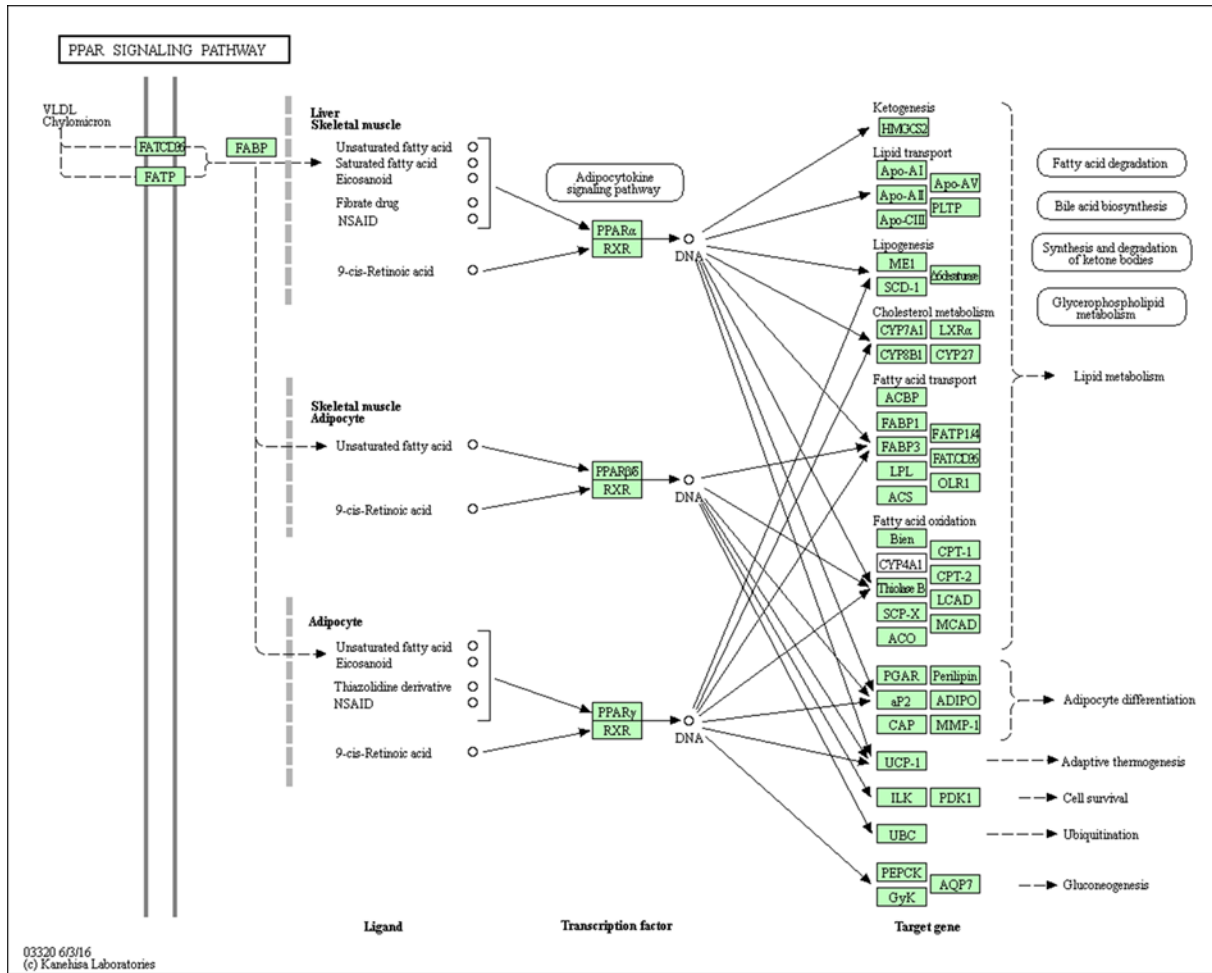

**Table S1. Patients Characteristics**

| <b>Characteristic</b>                | <b>AF(n=36)</b> | <b>SR(n=26)</b> |
|--------------------------------------|-----------------|-----------------|
| Gender (M:F)                         | 20:16           | 15:11           |
| Age (year)                           | 59.5±8.2        | 51.4±13.3       |
| BMI (kg/m <sup>2</sup> )             | 24.0±4.2        | 23.5±2.6        |
| Hypertension, n (%)                  | 4(11.1)         | 2(7.7)          |
| Hyperlipemia, n (%)                  | 3(8.3)          | 1(3.8)          |
| diabetes, n (%)                      | 2(5.6)          | 1(3.8)          |
| ACE inhibitors, n (%)                | 2(5.6)          | 1(3.8)          |
| AT1-blockers, n (%)                  | 0(0)            | 1(3.8)          |
| Nitrates, n (%)                      | 5(13.9)         | 2(7.7)          |
| Lipid-lowering drugs, n (%)          | 3(8.3)          | 1(3.8)          |
| Ca <sup>2+</sup> -antagonists, n (%) | 2(5.6)          | 1(3.8)          |
| LV-Dd, mm                            | 55.5±7.2        | 54.3±8.5        |
| LA-Ds <sub>(A-P)</sub> , mm          | 53.9±8.0        | 49.6±6.9        |
| RV-Dd <sub>(L-R)</sub> , mm          | 36.4±3.2        | 33.25±3.5       |
| RA-Ds <sub>(L-R)</sub> , mm          | 40.4±4.3        | 36.6±3.1        |
| LVEF                                 | 58.4±4.5        | 62.3±4.3        |

All variables displayed as mean±SEM;

AF=atrial fibrillation;

SR= sinus rhythm;

BMI= body mass index;

LV-Dd=left ventricular-diastolic diameter;

LA-Ds(A-P)=left atrium-systolic diameter (anterior-posterior);

RV-Dd(L-R)=right ventricular-diastolic diameter (left-right);

RA-Ds(L-R)=right atrium-systolic diameter (left-right);

LVEF= left ventricular ejection fraction;

**Table S2. Differential genes and proteins identified in tissues.**

## A. Differential genes identified in tissues.

| SRRA-VS-AFRA |           | SRRA-VS-AFLA |           | AFRA-VS-AFLA |           |
|--------------|-----------|--------------|-----------|--------------|-----------|
| Symbol       | log2Ratio | Symbol       | log2Ratio | Symbol       | log2Ratio |
| VGLL2        | 2.756     | CFC1         | -8.459    | DGAT2        | 1.477     |
| CFC1         | -4.344    | KRT19        | -3.325    | PITX2        | 5.946     |
| KRT19        | -3.036    | CNTFR        | -1.534    | GPD1         | 1.778     |
| CNTFR        | -1.522    | PLP1         | -1.264    | IGJ          | 1.265     |
| CPA4         | -2.268    | CPA4         | -3.013    | FOSB         | -2.185    |
| PPP1R1A      | -1.382    | PITX2        | 5.394     | CCL19        | 1.172     |
| XIST         | 6.689     | GNAO1        | -1.253    | BMP10        | -9.310    |
| LOC100216479 | -1.932    | XIST         | 6.455     | TUSC5        | 2.044     |
| ABAT         | 1.092     | DMKN         | -2.640    | RGS1         | -1.701    |
| FNDC5        | -1.025    | TPSB2        | 1.539     | CLDN5        | 1.473     |
| PTGDS        | -1.200    | LOC100216479 | -2.830    | PRSS35       | -2.217    |
| EGR2         | 2.328     | LFNG         | 1.355     | FCGR3A       | -1.066    |
| CXCR4        | 1.167     | NDUFA4L2     | 1.045     | ACTG2        | 1.519     |
| COMP         | 2.941     | COMP         | 3.230     | NPR3         | -1.615    |
| UPK1B        | -2.086    | CGNL1        | -1.737    | IGLL5        | 1.680     |
| IGJ          | 1.444     | ASPG         | -1.275    | NR4A2        | -1.565    |
| DNER         | -2.951    | CD36         | 1.147     | SFRP1        | 1.335     |
| UPK3B        | -4.164    | EFHD1        | 1.397     | THBS4        | 1.822     |
| CD37         | 1.401     | GPD1         | 1.079     | PPP1R14A     | 1.337     |
| CCL2         | 1.259     | TNFRSF12A    | 1.908     | SMYD2        | -1.574    |
| FOSB         | 3.944     | UPK1B        | -2.168    | CCL21        | 2.883     |
| PLA2G2A      | -1.475    | IGJ          | 2.709     | CIDEA        | 1.801     |
| CCL19        | 1.763     | DNER         | -2.515    | CIDEA        | 2.037     |
| CFB          | -1.457    | GPR126       | -1.791    | APOD         | 1.457     |
| CCL4L1       | 2.058     | RGS6         | -2.398    | ADIPOQ-AS1   | 1.851     |
| TSIX         | 4.082     | DIRAS3       | -1.821    | MYOZ1        | -2.366    |
| RGS1         | 3.206     | TGM2         | -1.065    | TAGLN        | 1.003     |
| RARRES1      | -1.372    | UPK3B        | -3.367    | C2orf40      | 1.178     |
| G0S2         | -1.113    | CD37         | 1.343     | SLN          | -1.897    |
| SULF1        | -1.129    | CCL2         | 1.386     | DARC         | 3.484     |
| SMOC1        | -1.726    | SGK110       | -1.349    | ART3         | -1.056    |
| EFNB3        | -2.922    | PLA2G2A      | -2.037    | GPIHBP1      | 1.660     |
| TNC          | 1.870     | TMEM100      | -1.542    | SMAD7        | -1.044    |
| CD52         | 2.061     | CPNE5        | -1.033    | TF           | 1.569     |
| LCP1         | 1.189     | INHA         | -2.576    | SPP1         | -1.316    |
| FHL2         | 1.479     | CCL19        | 2.936     | MYBPHL       | 1.243     |
| LSP1         | 1.104     | PTN          | 1.220     | CXCL14       | 2.313     |
| GADD45G      | -1.235    | CFB          | -1.724    | CSRP2        | 1.216     |
| CD79A        | 3.185     | BMP10        | -8.817    | ADAMTSL2     | -1.176    |
| HBG2         | -3.787    | HCN4         | -3.295    | ADM          | -1.748    |
| PKHD1L1      | -1.420    | EPHB6        | -1.721    | MAPK4        | -1.092    |



|           |        |          |        |          |        |
|-----------|--------|----------|--------|----------|--------|
| SOCS3     | 2.153  | TSIX     | 3.890  | MT3      | 3.051  |
| IGLL5     | 2.379  | RARRES1  | -2.099 | COLEC11  | -1.458 |
| SELENBP1  | -1.494 | SMOC1    | -2.486 | PLIN1    | 1.791  |
| MPZ       | -1.540 | EFNB3    | -2.448 | RBP4     | 1.512  |
| TREM2     | 1.730  | ACTG2    | 2.189  | IGFBP3   | -1.091 |
| SPRR2F    | -5.383 | CD52     | 2.259  | STEAP4   | 1.177  |
| KLK11     | -2.508 | LCP1     | 1.191  | ELK2AP   | 1.421  |
| SOSTDC1   | -3.126 | CSRP3    | 1.246  | APOA1    | -1.518 |
| C19orf33  | -2.848 | LSP1     | 1.440  | AZGP1    | 2.027  |
| STXBP6    | -1.850 | GNLY     | 2.676  | SCD      | 1.796  |
| RSP01     | -2.961 | TCEAL2   | -1.607 | TENM2    | -1.277 |
| ANXA8L2   | -2.938 | COL6A6   | -1.804 | TCF15    | 2.648  |
| CCL3      | 2.098  | A2M      | 1.112  | MYOT     | 1.461  |
| TGM1      | -2.329 | HBG2     | -4.486 | C1orf115 | 1.359  |
| LMAN1L    | -2.533 | GSTM5    | -1.705 | MARCO    | -2.572 |
| CCDC163P  | -2.547 | PKHD1L1  | -3.075 | CXorf36  | 1.376  |
| EGR1      | 1.618  | NPR3     | -2.027 | SMAD6    | -1.116 |
| SBSPON    | -2.134 | IGLL5    | 4.059  | ADIPOQ   | 1.877  |
| NR4A2     | 3.541  | CACNA2D2 | -2.153 | FABP4    | 2.127  |
| ADAMTS1   | 1.227  | SELENBP1 | -1.063 | MYL2     | 2.165  |
| PHGDH     | -1.774 | IRX3     | -2.094 | LIPE     | 1.754  |
| SLC6A6    | 1.288  | SPRR2F   | -5.447 | NTM      | -1.706 |
| IGFBP2    | 2.024  | KLK11    | -3.511 | DNASE1L3 | -1.484 |
| C1orf105  | -3.340 | LTB      | 1.878  | DISC2    | -3.050 |
| CRLF1     | 1.967  | SOSTDC1  | -2.769 | THRSP    | 1.829  |
| SMYD2     | 1.097  | PENK     | 3.509  | HAMP     | -7.334 |
| TM4SF1    | -1.179 | LRRC49   | -1.549 | SERF1A   | 9.442  |
| KRT7      | -1.935 | CXCL13   | 8.211  | FABP5    | 1.037  |
| MS4A1     | 3.678  | CPA3     | 2.441  | BTNL9    | 1.411  |
| CALB2     | -1.985 | SULT1A3  | 8.182  | CLDN18   | 4.909  |
| SLC2A3    | 1.529  | C19orf33 | -3.284 | CHGB     | 1.024  |
| SUSD4     | -1.455 | STXBP6   | -1.508 | FOS      | -1.013 |
| PEBP4     | -1.034 | ANXA8L2  | -3.404 | ACTA2    | 1.085  |
| SPOCK2    | -1.311 | TGM1     | -2.444 | C1QTNF9  | 2.610  |
| GAS1      | -1.169 | LMAN1L   | -1.311 |          |        |
| CCL18     | 1.889  | CCDC163P | -2.464 |          |        |
| MYRF      | -2.480 | SBSPON   | -2.516 |          |        |
| RPSAP58   | 4.477  | SFRP1    | 1.369  |          |        |
| MXRA5     | 1.612  | CD48     | 1.437  |          |        |
| GALNT16   | -1.287 | ADAMTS1  | 1.454  |          |        |
| PDZK1IP1  | -3.160 | PHGDH    | -1.589 |          |        |
| UNC5B-AS1 | 1.303  | HLA-DOA  | 1.568  |          |        |
| SYT13     | -3.518 | IGFBP2   | 2.392  |          |        |
| MSR1      | 1.436  | RPL3L    | 1.455  |          |        |
| SEMA3B    | -1.148 | BMX      | -1.733 |          |        |
| ATP1B4    | 3.023  | CRLF1    | 2.216  |          |        |
| PHLDA1    | 1.531  | THBS4    | 2.501  |          |        |
| MT1L      | -1.199 | PPP1R14A | 1.323  |          |        |

|          |        |            |        |
|----------|--------|------------|--------|
| FCGR2A   | 1.126  | MZB1       | 6.231  |
| ANXA8    | -3.233 | MEOX1      | 1.650  |
| SLC27A6  | -1.115 | MS4A1      | 3.322  |
| RARRES2  | -1.372 | CALB2      | -1.503 |
| KRT18    | -1.741 | CCL21      | 3.328  |
| HBB      | -1.596 | THBS2      | 1.118  |
| CCL4     | 1.698  | CIDEA      | 1.279  |
| SIK1     | 2.147  | LPL        | 1.584  |
| CCL3L1   | 8.458  | SUSD4      | -2.701 |
| COLQ     | 2.023  | APOD       | 1.220  |
| CDKN1A   | 1.458  | GAS1       | -1.498 |
| BNC1     | -2.668 | ADIPOQ-AS1 | 1.594  |
| ITLN1    | -3.026 | MYOZ1      | -2.566 |
| PDGFRL   | -1.760 | PDPN       | -1.651 |
| TNNT1    | 1.673  | MYRF       | -2.712 |
| SPP1     | 3.150  | S100A8     | 1.250  |
| MYBPHL   | -1.935 | RPSAP58    | 4.598  |
| MUSTN1   | -1.087 | GEM        | 1.436  |
| HBA2     | -1.939 | GPR22      | -1.282 |
| BCYRN1   | 1.206  | PDZK1IP1   | -3.313 |
| SFRP5    | -2.496 | UNC5B-AS1  | 1.729  |
| MEDAG    | -1.437 | MFAP5      | 1.176  |
| JUNB     | 1.963  | SEMA3B     | -1.297 |
| GSTM1    | -2.721 | SLN        | -2.811 |
| RBP4     | -1.689 | ATP1B4     | 2.640  |
| MYH6     | -1.091 | PHLDA1     | 1.429  |
| MAL2     | -2.374 | DARC       | 4.241  |
| TNNT3    | -1.115 | ART3       | -2.013 |
| HP       | -1.920 | ANXA8      | -2.901 |
| AOX1     | -1.527 | TMEM132C   | -1.842 |
| PRG4     | -2.524 | RARRES2    | -1.211 |
| TPSAB1   | 1.939  | KRT18      | -1.296 |
| SMTNL2   | -2.224 | HBB        | -2.126 |
| SLC7A11  | -2.758 | COLQ       | 2.028  |
| CARNS1   | -1.364 | CDKN1A     | 1.127  |
| RBP1     | -1.254 | SMAD7      | -1.062 |
| PTPRF    | -1.404 | BNC1       | -3.009 |
| ARL4D    | -1.293 | ITLN1      | -3.667 |
| LBH      | 1.020  | GRIN2C     | -1.696 |
| C3       | -1.087 | TNNT1      | 1.741  |
| CD83     | 1.719  | SPP1       | 1.834  |
| NR4A1    | 1.939  | MUSTN1     | -1.705 |
| ELK2AP   | 2.574  | HBA2       | -2.382 |
| RNA5-8S5 | 1.699  | ADM        | -2.064 |
| MT1X     | -2.049 | BCYRN1     | 2.146  |
| CPXM1    | -1.639 | SFRP5      | -2.962 |
| UBD      | 3.926  | SLC5A12    | -3.500 |
| DHCR24   | -1.469 | MEDAG      | -1.835 |

|          |        |          |        |
|----------|--------|----------|--------|
| APOA1    | 1.670  | PTGS1    | -1.777 |
| CLDN15   | -2.178 | JUNB     | 1.151  |
| MSLN     | -2.965 | GSTM1    | -2.273 |
| MARCO    | -1.514 | COLEC11  | -2.339 |
| RHBDL3   | -2.760 | FAM216B  | -1.222 |
| SYT4     | -2.315 | LEPR     | -1.174 |
| HBA1     | -1.564 | MAL2     | -2.017 |
| SNORD3A  | 8.148  | HP       | -2.608 |
| ANXA8L1  | -2.533 | AOX1     | -1.693 |
| BCHE     | -2.013 | PRG4     | -2.949 |
| GOLGA4   | 1.197  | ITGBL1   | 1.412  |
| LRRN4    | -2.707 | SOD3     | 1.075  |
| ALOX15   | -2.776 | TPSAB1   | 2.729  |
| ITLN2    | -3.560 | SMTNL2   | -3.080 |
| C4B_2    | -1.424 | SLC7A11  | -2.542 |
| RCAN1    | 1.240  | DDR1     | -1.203 |
| CYP4F30P | -2.550 | COL1A1   | 1.182  |
| OTOGL    | -1.666 | CARNS1   | -2.110 |
| CXCL9    | 2.836  | RBP1     | -1.200 |
| MT1G     | 3.694  | ARL4D    | -1.808 |
| ASPEN    | 1.289  | EMILIN3  | -1.419 |
| DHRS9    | 1.717  | CGN      | -2.883 |
| DNLZ     | 1.161  | STEAP4   | 1.268  |
| LYVE1    | -1.414 | NR4A1    | 1.285  |
| ZFP36    | 1.242  | ELK2AP   | 3.996  |
| CFI      | -1.100 | RNA5-8S5 | 1.309  |
| HLA-DPA1 | 1.099  | MT1X     | -2.384 |
| SHD      | -1.965 | GPC3     | -1.169 |
| CPLX3    | -3.102 | UBD      | 3.755  |
| PLLP     | -1.941 | FAM84A   | -4.177 |
| CSRNP1   | 1.575  | AZGP1    | 1.747  |
| SLPI     | -2.226 | SCD      | 1.528  |
| CHGB     | 2.830  | TENM2    | -1.286 |
| FOS      | 1.474  | CLDN15   | -2.316 |
| ANKRD23  | -2.120 | MSLN     | -3.515 |
| NPPB     | 4.479  | ZDHHC11  | -1.247 |
| RPS26    | -1.068 | MYOT     | 2.128  |
|          |        | MARCO    | -4.086 |
|          |        | CHODL    | -3.399 |
|          |        | NOTCH3   | 1.349  |
|          |        | SYT4     | -3.022 |
|          |        | CXorf36  | 1.448  |
|          |        | HBA1     | -2.110 |
|          |        | ADIPOQ   | 1.686  |
|          |        | SNORD3A  | 8.486  |
|          |        | ANXA8L1  | -3.281 |
|          |        | FABP4    | 1.694  |
|          |        | BCHE     | -1.878 |

|          |        |
|----------|--------|
| LRRN4    | -3.368 |
| MYL2     | 2.471  |
| NTM      | -2.336 |
| SLC4A4   | -1.581 |
| ALOX15   | -3.481 |
| ITLN2    | -3.643 |
| DNASE1L3 | -1.504 |
| DISC2    | -3.315 |
| VCAN     | 1.250  |
| RCAN1    | 1.256  |
| CYP4F30P | -9.194 |
| OTOGL    | -1.925 |
| CXCL9    | 2.357  |
| ASPN     | 1.185  |
| DHRS9    | 1.811  |
| S100A9   | 1.122  |
| SFRP4    | 1.167  |
| HPR      | -1.271 |
| RGS5     | 1.046  |
| LYVE1    | -1.808 |
| ALDH1A2  | -1.474 |
| THY1     | 1.697  |
| HAMP     | -7.473 |
| CFI      | -1.390 |
| SERF1A   | 9.442  |
| COL9A1   | -2.684 |
| SLC39A8  | -1.070 |
| SHD      | -1.651 |
| CPLX3    | -1.461 |
| PLLP     | -2.378 |
| SLPI     | -3.065 |
| PRR15    | -2.596 |
| CLDN18   | 4.194  |
| CHGB     | 3.854  |
| LTBP2    | 1.334  |
| NPPB     | 4.553  |
| CYR61    | 1.586  |
| GPM6A    | -2.597 |

---

B. Differential proteins identified in tissues.

| SRRA-VS-AFRA                   |             | SRRA-VS-AFLA                   |             | AFRA-VS-AFLA                   |             |
|--------------------------------|-------------|--------------------------------|-------------|--------------------------------|-------------|
| Accession                      | Fold Change | Accession                      | Fold Change | Accession                      | Fold Change |
| tr I1VZV6 I1VZV6_HUMAN         | 0.195       | sp O95393 BMP10_HUMAN          | 0.18        | sp O95393 BMP10_HUMAN          | 0.116       |
| tr D3GKD8 D3GKD8_HUMAN         | 0.243       | tr D3GKD8 D3GKD8_HUMAN         | 0.205       | sp Q9NP98 MYOZ1_HUMAN          | 0.294       |
| sp P02042 HBD_HUMAN            | 0.245       | sp P02042 HBD_HUMAN            | 0.316       | tr A0A0A0MSG2 A0A0A0MSG2_HUMAN | 0.465       |
| sp P05787 K2C8_HUMAN           | 0.258       | sp P08729 K2C7_HUMAN           | 0.336       | tr B1ALD9 B1ALD9_HUMAN         | 0.535       |
| sp P08729 K2C7_HUMAN           | 0.267       | tr Q5IWS5 Q5IWS5_HUMAN         | 0.355       | sp Q8TAE6 PP14C_HUMAN          | 0.555       |
| tr Q5IWS5 Q5IWS5_HUMAN         | 0.274       | sp Q9NP98 MYOZ1_HUMAN          | 0.37        | sp A6NMZ7 CO6A6_HUMAN          | 0.566       |
| tr E5RHP7 E5RHP7_HUMAN         | 0.306       | sp P05787 K2C8_HUMAN           | 0.382       | tr H3BRN4 H3BRN4_HUMAN         | 0.579       |
| sp P00918 CAH2_HUMAN           | 0.313       | tr A0A024R2V1 A0A024R2V1_HUMAN | 0.402       | tr A4UCS6 A4UCS6_HUMAN         | 0.609       |
| tr B2RA03 B2RA03_HUMAN         | 0.33        | tr B3VL28 B3VL28_HUMAN         | 0.403       | tr Q5T9B9 Q5T9B9_HUMAN         | 0.677       |
| sp P08727 K1C19_HUMAN          | 0.331       | sp P08727 K1C19_HUMAN          | 0.411       | sp P15848 ARSB_HUMAN           | 0.691       |
| sp A2RUH7 MBPHL_HUMAN          | 0.338       | sp P00918 CAH2_HUMAN           | 0.454       | tr V9GYG9 V9GYG9_HUMAN         | 0.704       |
| tr A0A024R2V1 A0A024R2V1_HUMAN | 0.427       | tr B4DMR6 B4DMR6_HUMAN         | 0.458       | tr B4DX19 B4DX19_HUMAN         | 0.706       |
| tr B4DMR6 B4DMR6_HUMAN         | 0.43        | tr B2R6F7 B2R6F7_HUMAN         | 0.478       | sp Q9BW30 TPPP3_HUMAN          | 0.706       |
| tr B2R6F7 B2R6F7_HUMAN         | 0.444       | sp Q9Y623 MYH4_HUMAN           | 0.492       | tr A0A0A0MTR1 A0A0A0MTR1_HUMAN | 0.708       |
| tr B3KUR3 B3KUR3_HUMAN         | 0.469       | tr B3KUR3 B3KUR3_HUMAN         | 0.545       | tr B4DGU4 B4DGU4_HUMAN         | 0.709       |
| sp P04040 CATA_HUMAN           | 0.538       | sp A2RUH7 MBPHL_HUMAN          | 0.552       | tr B4DL07 B4DL07_HUMAN         | 0.71        |
| sp P16157 ANK1_HUMAN           | 0.572       | tr A0A0A0MSG2 A0A0A0MSG2_HUMAN | 0.581       | sp P09936 UCHL1_HUMAN          | 0.733       |
| tr B2R8P6 B2R8P6_HUMAN         | 0.576       | sp Q9UK22 FBX2_HUMAN           | 0.591       | tr C9JWC3 C9JWC3_HUMAN         | 0.736       |
| tr H3BN14 H3BN14_HUMAN         | 0.592       | tr B4DUL3 B4DUL3_HUMAN         | 0.608       | tr A0A075B6R9 A0A075B6R9_HUMAN | 0.738       |
| tr A0A087WZE4 A0A087WZE4_HUMAN | 0.615       | tr B7Z4A1 B7Z4A1_HUMAN         | 0.612       | tr A0A087X1J7 A0A087X1J7_HUMAN | 0.738       |
| tr Q8N7G1 Q8N7G1_HUMAN         | 0.618       | tr K7ERI9 K7ERI9_HUMAN         | 0.626       | sp P19022 CADH2_HUMAN          | 0.745       |
| sp Q5T481 RBM20_HUMAN          | 0.622       | sp P16157 ANK1_HUMAN           | 0.643       | sp Q5BKX8 MURC_HUMAN           | 0.756       |

|                                |       |                                |       |                                |       |
|--------------------------------|-------|--------------------------------|-------|--------------------------------|-------|
| tr A0A0A0MRE3 A0A0A0MRE3_HUMAN | 0.622 | tr B4E1B2 B4E1B2_HUMAN         | 0.651 | tr K7ER74 K7ER74_HUMAN         | 0.757 |
| tr B7Z4V9 B7Z4V9_HUMAN         | 0.623 | sp Q9Y584 TIM22_HUMAN          | 0.66  | sp O75147 OBSL1_HUMAN          | 0.759 |
| tr Q0EFC6 Q0EFC6_HUMAN         | 0.629 | sp P09471 GNAO_HUMAN           | 0.661 | sp P01023 A2MG_HUMAN           | 0.761 |
| sp Q4G0N4 NAKD2_HUMAN          | 0.634 | tr B4DX19 B4DX19_HUMAN         | 0.662 | tr G3V1Y8 G3V1Y8_HUMAN         | 0.762 |
| tr A0A087WT59 A0A087WT59_HUMAN | 0.636 | tr A0A024R2V4 A0A024R2V4_HUMAN | 0.663 | tr S6AWE6 S6AWE6_HUMAN         | 0.768 |
| sp Q2TAY7 SMU1_HUMAN           | 0.638 | tr H6VRF8 H6VRF8_HUMAN         | 0.664 | sp P02792 FRIL_HUMAN           | 0.772 |
| sp P30043 BLVRB_HUMAN          | 0.649 | sp P04040 CATA_HUMAN           | 0.668 | sp P54652 HSP72_HUMAN          | 0.774 |
| tr A0A087WUF6 A0A087WUF6_HUMAN | 0.65  | sp Q86TP1 PRUNE_HUMAN          | 0.669 | tr H0UI60 H0UI60_HUMAN         | 0.781 |
| tr I3L2B0 I3L2B0_HUMAN         | 0.663 | tr G3V1Y8 G3V1Y8_HUMAN         | 0.678 | sp A4UGR9 XIRP2_HUMAN          | 0.783 |
| tr A0A024R825 A0A024R825_HUMAN | 0.664 | tr A0A024R4D5 A0A024R4D5_HUMAN | 0.683 | sp Q9UJS0 CMC2_HUMAN           | 0.783 |
| tr B2RB32 B2RB32_HUMAN         | 0.664 | tr B2R8P6 B2R8P6_HUMAN         | 0.684 | sp P02144 MYG_HUMAN            | 0.784 |
| sp O00483 NDUA4_HUMAN          | 0.665 | sp P68133 ACTS_HUMAN           | 0.687 | sp Q9UJY1 HSPB8_HUMAN          | 0.787 |
| sp P12429 ANXA3_HUMAN          | 0.679 | tr A0A087WTK8 A0A087WTK8_HUMAN | 0.689 | tr A8K141 A8K141_HUMAN         | 0.791 |
| tr H0YAC1 H0YAC1_HUMAN         | 0.681 | tr B4DL07 B4DL07_HUMAN         | 0.696 | tr A0A024RC87 A0A024RC87_HUMAN | 0.791 |
| sp Q13228 SBP1_HUMAN           | 0.683 | tr A0A087X1J7 A0A087X1J7_HUMAN | 0.696 | tr Q53FN1 Q53FN1_HUMAN         | 0.791 |
| sp Q5VTU8 AT5EL_HUMAN          | 0.685 | tr Q8N7G1 Q8N7G1_HUMAN         | 0.697 | sp Q99959 PKP2_HUMAN           | 0.793 |
| sp P62760 VISL1_HUMAN          | 0.686 | sp P30043 BLVRB_HUMAN          | 0.697 | tr A0A087WTE4 A0A087WTE4_HUMAN | 0.796 |
| sp P26678 PPLA_HUMAN           | 0.696 | tr B4DDB3 B4DDB3_HUMAN         | 0.697 | tr A0A0A0MS87 A0A0A0MS87_HUMAN | 0.798 |
| tr K7ERI9 K7ERI9_HUMAN         | 0.704 | tr A0A024R9B9 A0A024R9B9_HUMAN | 0.699 | tr Q5UGI6 Q5UGI6_HUMAN         | 0.801 |
| tr H0YL90 H0YL90_HUMAN         | 0.708 | sp Q07507 DERM_HUMAN           | 0.701 | tr Q53GU8 Q53GU8_HUMAN         | 0.803 |
| sp P15090 FABP4_HUMAN          | 0.709 | tr B2RB32 B2RB32_HUMAN         | 0.704 | tr Q9HCC1 Q9HCC1_HUMAN         | 0.805 |
| sp P09455 RET1_HUMAN           | 0.71  | sp Q6UWY5 OLFL1_HUMAN          | 0.709 | tr A0A024R884 A0A024R884_HUMAN | 0.805 |
| sp Q9NY47 CA2D2_HUMAN          | 0.714 | sp Q9NVI7 ATD3A_HUMAN          | 0.711 | sp P01619 KV301_HUMAN          | 0.807 |
| tr B4DVE1 B4DVE1_HUMAN         | 0.714 | sp Q9UBG0 MRC2_HUMAN           | 0.712 | tr E9PGC8 E9PGC8_HUMAN         | 0.809 |
| tr G3V325 G3V325_HUMAN         | 0.715 | sp Q5BKX8 MURC_HUMAN           | 0.712 | sp Q9Y676 RT18B_HUMAN          | 0.809 |

|                                |       |                                |       |                                |       |
|--------------------------------|-------|--------------------------------|-------|--------------------------------|-------|
| tr B3KSZ1 B3KSZ1_HUMAN         | 0.716 | tr H3BM67 H3BM67_HUMAN         | 0.714 | tr H0Y8G4 H0Y8G4_HUMAN         | 0.811 |
| sp P09669 COX6C_HUMAN          | 0.717 | tr A0A087WZE4 A0A087WZE4_HUMAN | 0.72  | sp Q6ZP80 TM182_HUMAN          | 0.812 |
| tr E7EQV9 E7EQV9_HUMAN         | 0.718 | tr A2RRE0 A2RRE0_HUMAN         | 0.722 | tr A0N5G5 A0N5G5_HUMAN         | 0.813 |
| tr H0YBX2 H0YBX2_HUMAN         | 0.718 | tr B3KM97 B3KM97_HUMAN         | 0.723 | sp P35221 CTNA1_HUMAN          | 0.817 |
| tr B2R6C0 B2R6C0_HUMAN         | 0.719 | sp O95210 STBD1_HUMAN          | 0.728 | tr Q6P528 Q6P528_HUMAN         | 0.818 |
| tr A0A0A0MR33 A0A0A0MR33_HUMAN | 0.719 | sp Q2TAY7 SMU1_HUMAN           | 0.729 | sp Q06828 FMOD_HUMAN           | 0.821 |
| tr H7BXZ6 H7BXZ6_HUMAN         | 0.719 | sp Q05707 COEA1_HUMAN          | 0.733 | tr A5YM48 A5YM48_HUMAN         | 0.822 |
| sp P23141 EST1_HUMAN           | 0.72  | sp P23141 EST1_HUMAN           | 0.733 | sp Q86TP1 PRUNE_HUMAN          | 0.822 |
| tr H0YI09 H0YI09_HUMAN         | 0.721 | sp Q9H7C9 AAMDC_HUMAN          | 0.733 | tr K7EMC7 K7EMC7_HUMAN         | 0.822 |
| tr B4DMD3 B4DMD3_HUMAN         | 0.722 | sp P05154 IPSP_HUMAN           | 0.737 | sp Q8NDY3 ARHL1_HUMAN          | 0.823 |
| tr B7Z601 B7Z601_HUMAN         | 0.722 | tr B4DI75 B4DI75_HUMAN         | 0.738 | tr A0A0A0MQY0 A0A0A0MQY0_HUMAN | 0.824 |
| tr D3DVH1 D3DVH1_HUMAN         | 0.726 | tr H0YL90 H0YL90_HUMAN         | 0.74  | tr A5PLL0 A5PLL0_HUMAN         | 0.824 |
| sp P61626 LYSC_HUMAN           | 0.728 | tr K7ER74 K7ER74_HUMAN         | 0.74  | sp Q07507 DERM_HUMAN           | 0.825 |
| sp Q14008 CKAP5_HUMAN          | 0.731 | tr B3KSZ1 B3KSZ1_HUMAN         | 0.741 | sp O60237 MYPT2_HUMAN          | 0.826 |
| sp P55001 MFAP2_HUMAN          | 0.731 | tr V9GYG9 V9GYG9_HUMAN         | 0.741 | tr H0YIV4 H0YIV4_HUMAN         | 0.826 |
| tr H3BUX2 H3BUX2_HUMAN         | 0.734 | sp Q9Y676 RT18B_HUMAN          | 0.741 | sp P02768 ALBU_HUMAN           | 0.827 |
| sp P05154 IPSP_HUMAN           | 0.737 | tr A0A024R172 A0A024R172_HUMAN | 0.743 | sp Q9UBY9 HSPB7_HUMAN          | 0.828 |
| tr Q7Z3Z1 Q7Z3Z1_HUMAN         | 0.737 | tr B2R773 B2R773_HUMAN         | 0.743 | sp Q9NQC3 RTN4_HUMAN           | 0.83  |
| tr A0A024R248 A0A024R248_HUMAN | 0.737 | tr U3KPS2 U3KPS2_HUMAN         | 0.745 | sp Q96DG6 CMBL_HUMAN           | 0.83  |
| tr Q6ZN40 Q6ZN40_HUMAN         | 0.738 | tr Q5VY30 Q5VY30_HUMAN         | 0.747 | sp O94811 TPPP_HUMAN           | 0.831 |
| sp P23142 FBLN1_HUMAN          | 0.739 | tr V9HW62 V9HW62_HUMAN         | 0.753 | sp Q9Y6I3 EPN1_HUMAN           | 0.831 |
| tr B1AP13 B1AP13_HUMAN         | 0.74  | tr J3KQY1 J3KQY1_HUMAN         | 0.755 | tr B4DFP1 B4DFP1_HUMAN         | 0.832 |
| sp Q9H7C9 AAMDC_HUMAN          | 0.74  | sp Q9UJS0 CMC2_HUMAN           | 0.755 | tr H0Y9H2 H0Y9H2_HUMAN         | 0.833 |
| sp P68133 ACTS_HUMAN           | 0.74  | sp P23142 FBLN1_HUMAN          | 0.756 | tr Q53GL5 Q53GL5_HUMAN         | 1.202 |
| sp Q9UBG0 MRC2_HUMAN           | 0.742 | tr A0A087X0E2 A0A087X0E2_HUMAN | 0.756 | tr B4DWA5 B4DWA5_HUMAN         | 1.204 |
| tr H3BNX8 H3BNX8_HUMAN         | 0.746 | tr H3BN14 H3BN14_HUMAN         | 0.757 | sp Q96CN7 ISOC1_HUMAN          | 1.204 |
| tr E9PN17 E9PN17_HUMAN         | 0.747 | tr A0A087WXX9 A0A087WXX9_HUMAN | 0.758 | tr B4DZG7 B4DZG7_HUMAN         | 1.204 |
| tr I3L0E3 I3L0E3_HUMAN         | 0.751 | sp P21397 AOFA_HUMAN           | 0.759 | sp Q9GZM7 TINAL_HUMAN          | 1.204 |

|                                |       |                                |       |                                |       |
|--------------------------------|-------|--------------------------------|-------|--------------------------------|-------|
| sp O60240 PLIN1_HUMAN          | 0.753 | tr B4DNG0 B4DNG0_HUMAN         | 0.761 | tr J3KS22 J3KS22_HUMAN         | 1.205 |
| tr Q5VY30 Q5VY30_HUMAN         | 0.756 | sp Q7L311 ARMX2_HUMAN          | 0.761 | sp P23396 RS3_HUMAN            | 1.207 |
| tr A0A059U7G5 A0A059U7G5_HUMAN | 0.757 | sp Q9HCB6 SPON1_HUMAN          | 0.763 | tr B0QYK0 B0QYK0_HUMAN         | 1.207 |
| sp Q4G176 ACSF3_HUMAN          | 0.758 | tr A0A024R825 A0A024R825_HUMAN | 0.767 | sp P09669 COX6C_HUMAN          | 1.209 |
| sp P48047 ATPO_HUMAN           | 0.759 | tr B4DMD3 B4DMD3_HUMAN         | 0.772 | tr E7EQV9 E7EQV9_HUMAN         | 1.211 |
| sp P21397 AOFA_HUMAN           | 0.759 | tr A5PLL0 A5PLL0_HUMAN         | 0.773 | sp Q9NZM1 MYOF_HUMAN           | 1.212 |
| tr B4DX19 B4DX19_HUMAN         | 0.763 | sp P54652 HSP72_HUMAN          | 0.773 | tr B2R5W3 B2R5W3_HUMAN         | 1.212 |
| tr Q2TB59 Q2TB59_HUMAN         | 0.763 | tr B4DXZ6 B4DXZ6_HUMAN         | 0.774 | tr B0QYN7 B0QYN7_HUMAN         | 1.214 |
| tr A0A0A0MTQ5 A0A0A0MTQ5_HUMAN | 0.764 | sp O00264 PGRC1_HUMAN          | 0.777 | sp P13010 XRCC5_HUMAN          | 1.215 |
| tr D3DWJ7 D3DWJ7_HUMAN         | 0.764 | tr A2RTY6 A2RTY6_HUMAN         | 0.777 | sp Q96IX5 USMG5_HUMAN          | 1.217 |
| sp P41222 PTGDS_HUMAN          | 0.766 | tr L8E853 L8E853_HUMAN         | 0.785 | sp Q92506 DHB8_HUMAN           | 1.218 |
| sp Q96IX5 USMG5_HUMAN          | 0.766 | tr H3BUX2 H3BUX2_HUMAN         | 0.788 | tr B7Z9B8 B7Z9B8_HUMAN         | 1.219 |
| tr A0A087X130 A0A087X130_HUMAN | 0.768 | tr D3DXF2 D3DXF2_HUMAN         | 0.791 | sp Q8NBX0 SCPDL_HUMAN          | 1.22  |
| sp P21912 SDHB_HUMAN           | 0.772 | sp P43652 AFAM_HUMAN           | 0.795 | tr D3DVH1 D3DVH1_HUMAN         | 1.22  |
| tr A0A024R4D5 A0A024R4D5_HUMAN | 0.772 | sp Q6ZP80 TM182_HUMAN          | 0.795 | tr A0A087WU72 A0A087WU72_HUMAN | 1.221 |
| sp Q6UWY5 OLFL1_HUMAN          | 0.772 | tr A0A087X130 A0A087X130_HUMAN | 0.796 | tr E2RVJ0 E2RVJ0_HUMAN         | 1.224 |
| tr Q9NSD0 Q9NSD0_HUMAN         | 0.775 | tr A0A024R2W4 A0A024R2W4_HUMAN | 0.797 | tr H3BN14 H3BN14_HUMAN         | 1.227 |
| sp Q9NZ08 ERAP1_HUMAN          | 0.776 | tr B4DVE1 B4DVE1_HUMAN         | 0.8   | tr H0YMF4 H0YMF4_HUMAN         | 1.228 |
| sp P23368 MAOM_HUMAN           | 0.776 | tr A0A024R1X8 A0A024R1X8_HUMAN | 0.801 | tr A6XNE2 A6XNE2_HUMAN         | 1.228 |
| sp Q13057 COASY_HUMAN          | 0.776 | sp Q9BX97 PLVAP_HUMAN          | 0.801 | tr A9LSU1 A9LSU1_HUMAN         | 1.23  |
| sp O00264 PGRC1_HUMAN          | 0.776 | sp P02768 ALBU_HUMAN           | 0.802 | tr A0A0A0MSZ4 A0A0A0MSZ4_HUMAN | 1.234 |
| tr A8JZZ8 A8JZZ8_HUMAN         | 0.777 | tr B7Z5J1 B7Z5J1_HUMAN         | 0.803 | sp O76076 WISP2_HUMAN          | 1.238 |
| sp Q9BS92 NPS3B_HUMAN          | 0.777 | tr A5YM48 A5YM48_HUMAN         | 0.805 | tr A0A024R825 A0A024R825_HUMAN | 1.238 |
| tr A0A024R9B9 A0A024R9B9_HUMAN | 0.779 | sp P26678 PPLA_HUMAN           | 0.806 | tr E5RHP7 E5RHP7_HUMAN         | 1.242 |
| tr A0A087WT47 A0A087WT47_HUMAN | 0.781 | tr B4DGU4 B4DGU4_HUMAN         | 0.806 | sp Q03135 CAV1_HUMAN           | 1.249 |



HUMAN

|                                |       |                                |       |                                |       |
|--------------------------------|-------|--------------------------------|-------|--------------------------------|-------|
| tr A0A024R172 A0A024R172_HUMAN | 0.786 | tr Q5T190 Q5T190_HUMAN         | 0.811 | tr A0A0A0MSQ0 A0A0A0MSQ0_HUMAN | 1.251 |
| tr B4DZL5 B4DZL5_HUMAN         | 0.786 | tr S6BAR0 S6BAR0_HUMAN         | 0.812 | tr Q6IB58 Q6IB58_HUMAN         | 1.251 |
| tr B2RDE0 B2RDE0_HUMAN         | 0.788 | sp Q9BU61 NDUF3_HUMAN          | 0.82  | sp P12429 ANXA3_HUMAN          | 1.253 |
| tr B4E2J1 B4E2J1_HUMAN         | 0.789 | sp P05546 HEP2_HUMAN           | 0.821 | sp Q16853 AOC3_HUMAN           | 1.255 |
| tr Q53FC3 Q53FC3_HUMAN         | 0.792 | sp P52179 MYOM1_HUMAN          | 0.821 | tr A8K1D2 A8K1D2_HUMAN         | 1.256 |
| sp P82673 RT35_HUMAN           | 0.795 | tr A0A087WUF6 A0A087WUF6_HUMAN | 0.821 | tr H0YG03 H0YG03_HUMAN         | 1.256 |
| tr B4DVV3 B4DVV3_HUMAN         | 0.796 | tr C9J712 C9J712_HUMAN         | 0.822 | tr E9PLM6 E9PLM6_HUMAN         | 1.258 |
| sp P14555 PA2GA_HUMAN          | 0.796 | tr B4DFP1 B4DFP1_HUMAN         | 0.824 | sp P10915 HPLN1_HUMAN          | 1.261 |
| sp O95210 STBD1_HUMAN          | 0.797 | tr B0AZQ4 B0AZQ4_HUMAN         | 0.825 | tr H9E7F4 H9E7F4_HUMAN         | 1.263 |
| tr A0A0A0MTR1 A0A0A0MTR1_HUMAN | 0.797 | sp Q9H2M9 RBGPR_HUMAN          | 0.825 | sp Q8WWP7 GIMA1_HUMAN          | 1.263 |
| tr M0R0P7 M0R0P7_HUMAN         | 0.798 | tr B7Z8A2 B7Z8A2_HUMAN         | 0.829 | tr A0A024QZE7 A0A024QZE7_HUMAN | 1.264 |
| tr A0A024R4Y7 A0A024R4Y7_HUMAN | 0.798 | sp Q9HBL7 PLRKT_HUMAN          | 0.829 | sp Q9NZN4 EHD2_HUMAN           | 1.265 |
| sp Q8N5K1 CISD2_HUMAN          | 0.8   | sp Q6UXB8 PI16_HUMAN           | 0.83  | sp Q969Z3 MARC2_HUMAN          | 1.267 |
| tr B4DVZ0 B4DVZ0_HUMAN         | 0.801 | tr B4E2J1 B4E2J1_HUMAN         | 0.831 | sp P06899 H2B1J_HUMAN          | 1.268 |
| tr H0YHA7 H0YHA7_HUMAN         | 0.807 | tr A0A024R1E2 A0A024R1E2_HUMAN | 0.831 | sp O95631 NET1_HUMAN           | 1.268 |
| sp Q07507 DERM_HUMAN           | 0.811 | tr A0A024R9U8 A0A024R9U8_HUMAN | 0.832 | tr B2RA03 B2RA03_HUMAN         | 1.27  |
| sp P14854 CX6B1_HUMAN          | 0.813 | sp Q99959 PKP2_HUMAN           | 0.832 | tr Q6LAP8 Q6LAP8_HUMAN         | 1.273 |
| tr B3KUE5 B3KUE5_HUMAN         | 0.814 | sp O00483 NDUA4_HUMAN          | 0.832 | tr B4DTY8 B4DTY8_HUMAN         | 1.276 |
| sp A2RTX5 SYTC2_HUMAN          | 0.816 | tr B4DZL5 B4DZL5_HUMAN         | 0.832 | tr J3QRS3 J3QRS3_HUMAN         | 1.276 |
| tr A8K9B2 A8K9B2_HUMAN         | 0.816 | tr Q59HA3 Q59HA3_HUMAN         | 1.202 | sp P20700 LMNB1_HUMAN          | 1.279 |
| sp O75947 ATP5H_HUMAN          | 0.817 | sp Q06323 PSME1_HUMAN          | 1.203 | tr F2Z3A7 F2Z3A7_HUMAN         | 1.282 |
| sp Q9Y230 RUVB2_HUMAN          | 0.818 | tr M0QXK2 M0QXK2_HUMAN         | 1.203 | tr Q0D2M2 Q0D2M2_HUMAN         | 1.286 |
| sp P27338 AOFB_HUMAN           | 0.82  | sp P23381 SYWC_HUMAN           | 1.204 | tr B2RA94 B2RA94_HUMAN         | 1.292 |
| sp Q8WVV4 POF1B_HUMAN          | 0.82  | tr E7EVA0 E7EVA0_HUMAN         | 1.204 | sp Q8N5M1 ATPF2_HUMAN          | 1.293 |
| tr F8W1A4 F8W1A4_HUMAN         | 0.82  | sp P29218 IMPA1_HUMAN          | 1.206 | tr G3V1V0 G3V1V0_HUMAN         | 1.294 |
| sp Q9NPJ3 ACO13_HUMAN          | 0.821 | sp Q9NWV4 CA123_HUMAN          | 1.207 | sp O60240 PLIN1_HUMAN          | 1.296 |
| tr A0A024RBE8 A0A024RBE8_HUMAN | 0.821 | tr D6RGG3 D6RGG3_HUMAN         | 1.207 | tr B4E380 B4E380_HUMAN         | 1.296 |

HUMAN

|                                |       |                                |       |                                |       |
|--------------------------------|-------|--------------------------------|-------|--------------------------------|-------|
| tr B4DNG0 B4DNG0_HUMAN         | 0.824 | tr A0A087WSV8 A0A087WSV8_HUMAN | 1.207 | sp P02649 APOE_HUMAN           | 1.299 |
| tr B7Z5J1 B7Z5J1_HUMAN         | 0.824 | sp Q9UII2 ATIF1_HUMAN          | 1.207 | sp P08572 CO4A2_HUMAN          | 1.301 |
| tr Q5T8U5 Q5T8U5_HUMAN         | 0.824 | tr Q5CZH6 Q5CZH6_HUMAN         | 1.208 | sp P08729 K2C7_HUMAN           | 1.306 |
| sp Q8WW59 SPRY4_HUMAN          | 0.826 | sp P61604 CH10_HUMAN           | 1.209 | sp P00918 CAH2_HUMAN           | 1.308 |
| sp Q96FQ6 S10AG_HUMAN          | 0.827 | sp P61970 NTF2_HUMAN           | 1.209 | sp Q15417 CNN3_HUMAN           | 1.312 |
| sp P25325 THTM_HUMAN           | 0.828 | sp P07360 CO8G_HUMAN           | 1.212 | sp Q969G5 PRDBP_HUMAN          | 1.318 |
| tr A0A024RDX4 A0A024RDX4_HUMAN | 0.829 | tr B3KSI7 B3KSI7_HUMAN         | 1.213 | tr Q6ZN40 Q6ZN40_HUMAN         | 1.322 |
| sp Q13425 SNTB2_HUMAN          | 0.829 | tr A0A024R258 A0A024R258_HUMAN | 1.214 | tr Q5IWS5 Q5IWS5_HUMAN         | 1.322 |
| sp Q9BX97 PLVAP_HUMAN          | 0.83  | sp P05387 RLA2_HUMAN           | 1.214 | tr H0YGX7 H0YGX7_HUMAN         | 1.323 |
| sp P14927 QCR7_HUMAN           | 0.831 | sp A2RTX5 SYTC2_HUMAN          | 1.216 | tr B4E200 B4E200_HUMAN         | 1.337 |
| sp P43652 AFAM_HUMAN           | 0.832 | tr B2RDQ3 B2RDQ3_HUMAN         | 1.217 | sp Q15746 MYLK_HUMAN           | 1.346 |
| tr M0QYS1 M0QYS1_HUMAN         | 0.833 | sp Q5R372 RBG1L_HUMAN          | 1.217 | tr Q59FG9 Q59FG9_HUMAN         | 1.362 |
| tr K7ESP4 K7ESP4_HUMAN         | 0.833 | tr B3KM80 B3KM80_HUMAN         | 1.219 | sp P05109 S10A8_HUMAN          | 1.38  |
| sp P19652 A1AG2_HUMAN          | 1.201 | sp P62857 RS28_HUMAN           | 1.219 | tr B2ZGL7 B2ZGL7_HUMAN         | 1.381 |
| tr Q15374 Q15374_HUMAN         | 1.202 | sp P32418 NAC1_HUMAN           | 1.22  | sp P02042 HBD_HUMAN            | 1.385 |
| tr K7EKW4 K7EKW4_HUMAN         | 1.203 | tr B2RB23 B2RB23_HUMAN         | 1.22  | tr B7Z832 B7Z832_HUMAN         | 1.389 |
| tr Q5RKT7 Q5RKT7_HUMAN         | 1.203 | tr A0A090N8G0 A0A090N8G0_HUMAN | 1.223 | tr A0A024QZJ6 A0A024QZJ6_HUMAN | 1.393 |
| tr B4DS05 B4DS05_HUMAN         | 1.203 | tr B4E200 B4E200_HUMAN         | 1.224 | tr A0A024R035 A0A024R035_HUMAN | 1.398 |
| sp P31946 1433B_HUMAN          | 1.203 | sp Q96QR8 PURB_HUMAN           | 1.224 | sp Q02338 BDH_HUMAN            | 1.417 |
| sp P01616 KV203_HUMAN          | 1.205 | tr H0YCP8 H0YCP8_HUMAN         | 1.225 | sp A2RTX5 SYTC2_HUMAN          | 1.425 |
| tr Q5U043 Q5U043_HUMAN         | 1.208 | tr J3KQ99 J3KQ99_HUMAN         | 1.225 | sp P49327 FAS_HUMAN            | 1.43  |
| tr B3KSI7 B3KSI7_HUMAN         | 1.208 | tr Q32Q10 Q32Q10_HUMAN         | 1.225 | sp Q01469 FABP5_HUMAN          | 1.436 |
| tr H0Y7A7 H0Y7A7_HUMAN         | 1.208 | tr B3KRM8 B3KRM8_HUMAN         | 1.226 | tr B4DEA7 B4DEA7_HUMAN         | 1.454 |
| tr Q53Y47 Q53Y47_HUMAN         | 1.211 | sp Q09028 RBBP4_HUMAN          | 1.227 | tr B2R941 B2R941_HUMAN         | 1.458 |
| tr G3V4P8 G3V4P8_HUMAN         | 1.211 | tr B4E0U6 B4E0U6_HUMAN         | 1.227 | sp O43707 ACTN4_HUMAN          | 1.473 |
| sp Q92890 UFD1_HUMAN           | 1.211 | tr H3BRU6 H3BRU6_HUMAN         | 1.23  | tr B3KUB8 B3KUB8_HUMAN         | 1.481 |
| sp P06727 APOA4_HUMAN          | 1.212 | sp Q8WUW1 BRK1_HUMAN           | 1.23  | tr B2R4M6 B2R4M6_HUMAN         | 1.487 |
| tr Q4G1C4 Q4G1C4_HUMAN         | 1.212 | tr Q3LIE9 Q3LIE9_HUMAN         | 1.231 | tr A0A024QZ34 A0A024QZ34_HUMAN | 1.499 |

|                                |       |                                |       |                        |       |
|--------------------------------|-------|--------------------------------|-------|------------------------|-------|
| tr A0A087WUQ6 A0A087WUQ6_HUMAN | 1.213 | sp P26885 FKBP2_HUMAN          | 1.232 | sp P15121 ALDR_HUMAN   | 1.511 |
| sp Q15746 MYLK_HUMAN           | 1.213 | sp P26447 S10A4_HUMAN          | 1.232 | tr B4DVZ0 B4DVZ0_HUMAN | 1.524 |
| tr E7EMG9 E7EMG9_HUMAN         | 1.214 | sp P0C0S5 H2AZ_HUMAN           | 1.232 | sp P05787 K2C8_HUMAN   | 1.531 |
| tr H3BPK3 H3BPK3_HUMAN         | 1.215 | sp O75368 SH3L1_HUMAN          | 1.233 | tr J3QRN6 J3QRN6_HUMAN | 1.538 |
| tr V9HW38 V9HW38_HUMAN         | 1.215 | sp O00151 PDLI1_HUMAN          | 1.235 | sp P51911 CNN1_HUMAN   | 1.54  |
| sp Q9BX66 SRBS1_HUMAN          | 1.216 | sp Q15435 PP1R7_HUMAN          | 1.235 | tr E9PIM6 E9PIM6_HUMAN | 1.545 |
| sp P37837 TALDO_HUMAN          | 1.216 | tr Q53Y47 Q53Y47_HUMAN         | 1.236 | tr G3XAP6 G3XAP6_HUMAN | 1.549 |
| sp Q9H479 FN3K_HUMAN           | 1.218 | tr Q15374 Q15374_HUMAN         | 1.236 | sp P59665 DEF1_HUMAN   | 1.551 |
| sp Q04917 1433F_HUMAN          | 1.22  | tr A9LSU1 A9LSU1_HUMAN         | 1.237 | sp A2RUH7 MBPHL_HUMAN  | 1.574 |
| sp Q15843 NEDD8_HUMAN          | 1.22  | tr B2R6C0 B2R6C0_HUMAN         | 1.239 | sp P31146 COR1A_HUMAN  | 1.61  |
| tr A0A0A0MSG2 A0A0A0MSG2_HUMAN | 1.221 | sp Q9Y5S9 RBM8A_HUMAN          | 1.241 | sp P08493 MGP_HUMAN    | 1.676 |
| tr Q59EG0 Q59EG0_HUMAN         | 1.223 | sp O95433 AHSA1_HUMAN          | 1.243 | tr B3KVC9 B3KVC9_HUMAN | 1.68  |
| sp Q96JB5 CK5P3_HUMAN          | 1.225 | sp P13929 ENOB_HUMAN           | 1.244 | tr B3KTQ2 B3KTQ2_HUMAN | 1.685 |
| tr B2R4M6 B2R4M6_HUMAN         | 1.226 | tr B3KX72 B3KX72_HUMAN         | 1.244 | sp Q9NR12 PDLI7_HUMAN  | 1.695 |
| sp P13929 ENOB_HUMAN           | 1.231 | sp P43490 NAMPT_HUMAN          | 1.245 | tr I1VZV6 I1VZV6_HUMAN | 1.76  |
| sp P61158 ARP3_HUMAN           | 1.232 | sp P68036 UB2L3_HUMAN          | 1.245 | tr B2R6C0 B2R6C0_HUMAN | 1.768 |
| sp O15144 ARPC2_HUMAN          | 1.233 | tr A0A087WXM6 A0A087WXM6_HUMAN | 1.247 | sp P02747 C1QC_HUMAN   | 1.782 |
| sp P35579 MYH9_HUMAN           | 1.234 | tr B3KM95 B3KM95_HUMAN         | 1.247 | sp O75339 CILP1_HUMAN  | 1.816 |
| sp Q9UJY1 HSPB8_HUMAN          | 1.234 | sp O75369 FLNB_HUMAN           | 1.247 | tr B3KRN4 B3KRN4_HUMAN | 1.931 |
| tr A0A090N8G0 A0A090N8G0_HUMAN | 1.236 | tr Q6FIE5 Q6FIE5_HUMAN         | 1.248 | sp P61626 LYSC_HUMAN   | 1.949 |
| tr B5BTY4 B5BTY4_HUMAN         | 1.239 | tr A8K4G7 A8K4G7_HUMAN         | 1.249 | sp P02743 SAMP_HUMAN   | 2.128 |
| sp Q16082 HSPB2_HUMAN          | 1.239 | sp Q13103 SPP24_HUMAN          | 1.249 | tr X6RLJ0 X6RLJ0_HUMAN | 2.168 |
| sp Q13442 HAP28_HUMAN          | 1.239 | tr B3KTA3 B3KTA3_HUMAN         | 1.251 | sp Q8N474 SFRP1_HUMAN  | 2.428 |
| sp P19623 SPEE_HUMAN           | 1.24  | sp Q9NR28 DBLOH_HUMAN          | 1.251 | sp P48061 SDF1_HUMAN   | 2.448 |
| sp Q9UMX5 NENF_HUMAN           | 1.241 | sp Q15293 RCN1_HUMAN           | 1.251 | tr A1KY36 A1KY36_HUMAN | 2.539 |
| sp P63104 1433Z_HUMAN          | 1.243 | sp Q96AG4 LRC59_HUMAN          | 1.255 | sp P15090 FABP4_HUMAN  | 2.616 |
| sp Q4KWH8 PLCH1_HUMAN          | 1.246 | tr A0A024R5M3 A0A024R5M3_HUMAN | 1.256 |                        |       |
| sp P62820 RAB1A_HUMAN          | 1.249 | tr M0QYT0 M0QYT0_HUMAN         | 1.257 |                        |       |
| sp Q9BW30 TPPP3_HUMAN          | 1.249 | tr B3KN06 B3KN06_HUMAN         | 1.257 |                        |       |
| sp Q13103 SPP24_HUMAN          | 1.25  | sp Q9NZA1 CLIC5_HUMAN          | 1.258 |                        |       |

|                                |       |                                |       |
|--------------------------------|-------|--------------------------------|-------|
| sp O15061 SYNEM_HUMAN          | 1.25  | tr H0Y614 H0Y614_HUMAN         | 1.258 |
| tr A0A024QZT9 A0A024QZT9_HUMAN | 1.251 | tr A0A087WYR3 A0A087WYR3_HUMAN | 1.26  |
| sp Q9NP98 MYOZ1_HUMAN          | 1.254 | tr J3KR44 J3KR44_HUMAN         | 1.26  |
| sp Q02252 MMSA_HUMAN           | 1.255 | tr X6RFL8 X6RFL8_HUMAN         | 1.26  |
| sp O95393 BMP10_HUMAN          | 1.255 | sp Q9UMX5 NENF_HUMAN           | 1.261 |
| sp Q15435 PP1R7_HUMAN          | 1.255 | tr B2RAY1 B2RAY1_HUMAN         | 1.261 |
| sp P31146 COR1A_HUMAN          | 1.257 | sp O43776 SYNC_HUMAN           | 1.261 |
| tr A0A087WTH0 A0A087WTH0_HUMAN | 1.257 | sp Q96JB5 CK5P3_HUMAN          | 1.262 |
| tr M0QXF9 M0QXF9_HUMAN         | 1.258 | sp P31946 1433B_HUMAN          | 1.263 |
| sp Q9GZM7 TINAL_HUMAN          | 1.258 | sp Q03135 CAV1_HUMAN           | 1.264 |
| sp P09211 GSTP1_HUMAN          | 1.259 | tr B4DQ92 B4DQ92_HUMAN         | 1.265 |
| tr B4DH02 B4DH02_HUMAN         | 1.26  | tr B3KXD1 B3KXD1_HUMAN         | 1.268 |
| tr E9PB61 E9PB61_HUMAN         | 1.261 | tr Q9UL89 Q9UL89_HUMAN         | 1.269 |
| sp P07737 PROF1_HUMAN          | 1.261 | tr Q53FI7 Q53FI7_HUMAN         | 1.269 |
| tr Q6FIE5 Q6FIE5_HUMAN         | 1.262 | sp Q4KWH8 PLCH1_HUMAN          | 1.271 |
| tr D6RAW2 D6RAW2_HUMAN         | 1.262 | tr B4DVZ0 B4DVZ0_HUMAN         | 1.273 |
| sp P19022 CADH2_HUMAN          | 1.266 | sp P61586 RHOA_HUMAN           | 1.273 |
| tr A0A0A0MQY0 A0A0A0MQY0_HUMAN | 1.271 | tr A0A0A0MTH3 A0A0A0MTH3_HUMAN | 1.278 |
| tr A0A0A0MSQ0 A0A0A0MSQ0_HUMAN | 1.271 | tr Q5U071 Q5U071_HUMAN         | 1.279 |
| sp Q14315 FLNC_HUMAN           | 1.271 | tr Q5U043 Q5U043_HUMAN         | 1.28  |
| tr A0A087WYR3 A0A087WYR3_HUMAN | 1.273 | tr A0A087X1K9 A0A087X1K9_HUMAN | 1.28  |
| sp P26038 MOES_HUMAN           | 1.275 | sp Q96D15 RCN3_HUMAN           | 1.28  |
| tr J3KQ99 J3KQ99_HUMAN         | 1.278 | tr B4E2A3 B4E2A3_HUMAN         | 1.284 |
| tr A1L172 A1L172_HUMAN         | 1.279 | sp Q02252 MMSA_HUMAN           | 1.284 |
| sp Q9UBY9 HSPB7_HUMAN          | 1.28  | tr A0A087WTH0 A0A087WTH0_HUMAN | 1.284 |
| sp P35754 GLRX1_HUMAN          | 1.282 | tr B2R5W3 B2R5W3_HUMAN         | 1.286 |
| tr Q8TCF0 Q8TCF0_HUMAN         | 1.283 | tr B4DWC4 B4DWC4_HUMAN         | 1.286 |
| sp Q9H987 SYP2L_HUMAN          | 1.284 | tr Q5JNW7 Q5JNW7_HUMAN         | 1.287 |
| sp P07305 H10_HUMAN            | 1.284 | tr Q5RKT7 Q5RKT7_HUMAN         | 1.291 |

|                                |       |                                |       |
|--------------------------------|-------|--------------------------------|-------|
| tr A0A024R895 A0A024R895_HUMAN | 1.286 | sp Q0ZGT2 NEXN_HUMAN           | 1.291 |
| sp Q8WW22 DNJA4_HUMAN          | 1.288 | tr Q6P528 Q6P528_HUMAN         | 1.291 |
| sp Q01995 TAGL_HUMAN           | 1.288 | tr A0A024R9E2 A0A024R9E2_HUMAN | 1.292 |
| tr G3V1V0 G3V1V0_HUMAN         | 1.292 | sp P19021 AMD_HUMAN            | 1.296 |
| sp Q13885 TBB2A_HUMAN          | 1.292 | tr B4DWA5 B4DWA5_HUMAN         | 1.296 |
| tr B3KXC3 B3KXC3_HUMAN         | 1.293 | sp Q04917 1433F_HUMAN          | 1.299 |
| sp Q01469 FABP5_HUMAN          | 1.293 | sp Q8WW22 DNJA4_HUMAN          | 1.3   |
| sp Q9HCH3 CPNE5_HUMAN          | 1.293 | tr H0Y9H2 H0Y9H2_HUMAN         | 1.301 |
| tr B3KXD1 B3KXD1_HUMAN         | 1.294 | tr H0YL18 H0YL18_HUMAN         | 1.301 |
| tr C9JC84 C9JC84_HUMAN         | 1.299 | sp P52907 CAZA1_HUMAN          | 1.301 |
| tr B5BUI8 B5BUI8_HUMAN         | 1.3   | sp P62820 RAB1A_HUMAN          | 1.303 |
| tr A0A024R091 A0A024R091_HUMAN | 1.303 | sp Q02338 BDH_HUMAN            | 1.305 |
| tr B2R6M6 B2R6M6_HUMAN         | 1.303 | tr B2R6S5 B2R6S5_HUMAN         | 1.305 |
| sp O60237 MYPT2_HUMAN          | 1.305 | tr A0A024R091 A0A024R091_HUMAN | 1.306 |
| tr F8WAR2 F8WAR2_HUMAN         | 1.305 | tr A8K4V6 A8K4V6_HUMAN         | 1.306 |
| tr H7BZJ3 H7BZJ3_HUMAN         | 1.308 | sp Q9BX66 SRBS1_HUMAN          | 1.308 |
| sp P78539 SRPX_HUMAN           | 1.309 | tr B3KR50 B3KR50_HUMAN         | 1.308 |
| tr Q59GM9 Q59GM9_HUMAN         | 1.31  | sp P31949 S10AB_HUMAN          | 1.309 |
| tr H0Y614 H0Y614_HUMAN         | 1.311 | tr H0YIV4 H0YIV4_HUMAN         | 1.31  |
| tr B2RAY1 B2RAY1_HUMAN         | 1.312 | sp Q9BRA2 TXD17_HUMAN          | 1.31  |
| tr B4DV28 B4DV28_HUMAN         | 1.316 | tr B5BU25 B5BU25_HUMAN         | 1.313 |
| sp P02671 FIBA_HUMAN           | 1.322 | sp P07237 PDIA1_HUMAN          | 1.313 |
| tr B4DWC4 B4DWC4_HUMAN         | 1.327 | tr H3BPE7 H3BPE7_HUMAN         | 1.318 |
| tr A0A087WZF1 A0A087WZF1_HUMAN | 1.327 | tr A0A087WXL8 A0A087WXL8_HUMAN | 1.32  |
| sp P07437 TBB5_HUMAN           | 1.336 | tr B4DNP0 B4DNP0_HUMAN         | 1.321 |
| sp Q07960 RHG01_HUMAN          | 1.337 | tr C9J8S2 C9J8S2_HUMAN         | 1.323 |
| tr A0A068LKR7 A0A068LKR7_HUMAN | 1.34  | sp P07305 H10_HUMAN            | 1.326 |
| tr B2R6D7 B2R6D7_HUMAN         | 1.347 | sp O15144 ARPC2_HUMAN          | 1.327 |
| tr Q5U000 Q5U000_HUMAN         | 1.348 | tr E7EQ72 E7EQ72_HUMAN         | 1.327 |

|                                |       |                                |       |
|--------------------------------|-------|--------------------------------|-------|
| sp P35221 CTNA1_HUMAN          | 1.348 | sp Q16543 CDC37_HUMAN          | 1.328 |
| tr B2RDY9 B2RDY9_HUMAN         | 1.349 | sp Q702N8 XIRP1_HUMAN          | 1.33  |
| tr E7EVA0 E7EVA0_HUMAN         | 1.349 | tr J3KS22 J3KS22_HUMAN         | 1.334 |
| sp P09936 UCHL1_HUMAN          | 1.356 | sp P31150 GDIA_HUMAN           | 1.338 |
| tr A0A024RDA6 A0A024RDA6_HUMAN | 1.357 | tr B4DV28 B4DV28_HUMAN         | 1.339 |
| sp Q15847 ADIRF_HUMAN          | 1.361 | sp P20962 PTMS_HUMAN           | 1.339 |
| tr B3KQK4 B3KQK4_HUMAN         | 1.363 | sp Q9Y266 NUDC_HUMAN           | 1.34  |
| sp Q702N8 XIRP1_HUMAN          | 1.364 | tr Q7KZA3 Q7KZA3_HUMAN         | 1.343 |
| sp O94811 TPPP_HUMAN           | 1.366 | sp P26038 MOES_HUMAN           | 1.343 |
| tr B4DEA6 B4DEA6_HUMAN         | 1.369 | sp P61158 ARP3_HUMAN           | 1.344 |
| sp P02763 A1AG1_HUMAN          | 1.369 | tr Q6DEN2 Q6DEN2_HUMAN         | 1.345 |
| sp Q9BUF5 TBB6_HUMAN           | 1.373 | sp P23396 RS3_HUMAN            | 1.345 |
| tr A4UCS6 A4UCS6_HUMAN         | 1.374 | tr A0A024RDB4 A0A024RDB4_HUMAN | 1.345 |
| tr E9PGC8 E9PGC8_HUMAN         | 1.374 | sp Q15181 IPYR_HUMAN           | 1.347 |
| sp Q9UDY4 DNJB4_HUMAN          | 1.376 | sp P01034 CYTC_HUMAN           | 1.35  |
| sp P37802 TAGL2_HUMAN          | 1.381 | sp P50897 PPT1_HUMAN           | 1.352 |
| sp Q9BXX0 EMIL2_HUMAN          | 1.383 | sp O15511 ARPC5_HUMAN          | 1.359 |
| tr E5KN59 E5KN59_HUMAN         | 1.384 | sp Q9NZU5 LMCD1_HUMAN          | 1.364 |
| tr A8K3B0 A8K3B0_HUMAN         | 1.386 | tr A0A024R895 A0A024R895_HUMAN | 1.366 |
| sp P04080 CYTB_HUMAN           | 1.388 | tr F8WCF6 F8WCF6_HUMAN         | 1.368 |
| sp Q9UHL4 DPP2_HUMAN           | 1.39  | sp P02763 A1AG1_HUMAN          | 1.37  |
| tr A0A024R6X1 A0A024R6X1_HUMAN | 1.392 | sp P07437 TBB5_HUMAN           | 1.373 |
| sp Q9NR12 PDLI7_HUMAN          | 1.393 | tr B4DKJ4 B4DKJ4_HUMAN         | 1.384 |
| sp P15848 ARSB_HUMAN           | 1.393 | tr J3KRG9 J3KRG9_HUMAN         | 1.386 |
| tr Q9UL89 Q9UL89_HUMAN         | 1.4   | tr B2R6M6 B2R6M6_HUMAN         | 1.387 |
| sp Q0ZGT2 NEXN_HUMAN           | 1.409 | tr A1L172 A1L172_HUMAN         | 1.396 |
| sp P01619 KV301_HUMAN          | 1.415 | tr B2RDY9 B2RDY9_HUMAN         | 1.397 |
| tr B2R548 B2R548_HUMAN         | 1.416 | tr B4DND4 B4DND4_HUMAN         | 1.4   |
| sp Q9NZA1 CLIC5_HUMAN          | 1.423 | tr A0A024RAM4 A0A024RAM4_HUMAN | 1.402 |
| sp O95817 BAG3_HUMAN           | 1.426 | tr A0A024RDA6 A0A024RDA6       | 1.403 |

|                                |       |                                |       |
|--------------------------------|-------|--------------------------------|-------|
|                                |       | _HUMAN                         |       |
| tr J3KTF8 J3KTF8_HUMAN         | 1.431 | sp P08294 SODE_HUMAN           | 1.406 |
| sp P20962 PTMS_HUMAN           | 1.433 | tr A0A087X1Z3 A0A087X1Z3_HUMAN | 1.409 |
| sp P00488 F13A_HUMAN           | 1.437 | sp P62306 RUXF_HUMAN           | 1.412 |
| tr A0A024RAF2 A0A024RAF2_HUMAN | 1.437 | tr M0QXF9 M0QXF9_HUMAN         | 1.417 |
| sp Q14894 CRYM_HUMAN           | 1.441 | sp P06727 APOA4_HUMAN          | 1.417 |
| sp Q9NZN3 EHD3_HUMAN           | 1.444 | tr A6XNE2 A6XNE2_HUMAN         | 1.427 |
| tr B4DKJ4 B4DKJ4_HUMAN         | 1.447 | tr J3KPM9 J3KPM9_HUMAN         | 1.429 |
| tr A0A024R493 A0A024R493_HUMAN | 1.45  | tr K7EMY7 K7EMY7_HUMAN         | 1.434 |
| sp P27348 I433T_HUMAN          | 1.451 | tr V9HW38 V9HW38_HUMAN         | 1.435 |
| sp P01903 DRA_HUMAN            | 1.461 | sp P14550 AK1A1_HUMAN          | 1.438 |
| sp P31150 GDIA_HUMAN           | 1.464 | tr A8K3B0 A8K3B0_HUMAN         | 1.439 |
| sp Q15417 CNN3_HUMAN           | 1.473 | tr B5BUI8 B5BUI8_HUMAN         | 1.44  |
| tr G3V3X5 G3V3X5_HUMAN         | 1.478 | tr Q8TCF0 Q8TCF0_HUMAN         | 1.442 |
| sp Q15942 ZYX_HUMAN            | 1.484 | tr B0QYK0 B0QYK0_HUMAN         | 1.444 |
| tr B4DUJ6 B4DUJ6_HUMAN         | 1.484 | tr Q6N093 Q6N093_HUMAN         | 1.445 |
| sp P12109 CO6A1_HUMAN          | 1.486 | sp O95631 NET1_HUMAN           | 1.445 |
| tr A0A087WUI4 A0A087WUI4_HUMAN | 1.494 | sp P00338 LDHA_HUMAN           | 1.447 |
| sp P12110 CO6A2_HUMAN          | 1.498 | sp P78539 SRPX_HUMAN           | 1.448 |
| tr H0YIV4 H0YIV4_HUMAN         | 1.508 | tr B4E3A8 B4E3A8_HUMAN         | 1.451 |
| tr B4E3A8 B4E3A8_HUMAN         | 1.51  | tr A0A024R493 A0A024R493_HUMAN | 1.465 |
| tr B2R6S5 B2R6S5_HUMAN         | 1.51  | sp P37802 TAGL2_HUMAN          | 1.467 |
| tr B3KXB8 B3KXB8_HUMAN         | 1.516 | sp P61626 LYSC_HUMAN           | 1.471 |
| tr Q6P528 Q6P528_HUMAN         | 1.517 | tr E7EMG9 E7EMG9_HUMAN         | 1.472 |
| tr A2A2D0 A2A2D0_HUMAN         | 1.523 | sp Q9NZN3 EHD3_HUMAN           | 1.478 |
| tr B4DI69 B4DI69_HUMAN         | 1.527 | tr A0A024R0K2 A0A024R0K2_HUMAN | 1.485 |
| tr J3KRG9 J3KRG9_HUMAN         | 1.536 | tr J3QRS3 J3QRS3_HUMAN         | 1.491 |
| tr Q5STX8 Q5STX8_HUMAN         | 1.55  | tr B3KM68 B3KM68_HUMAN         | 1.496 |
| sp Q6EEV6 SUMO4_HUMAN          | 1.553 | tr W6A4U0 W6A4U0_HUMAN         | 1.498 |

|                                |       |                                |       |
|--------------------------------|-------|--------------------------------|-------|
| sp P0C0L5 CO4B_HUMAN           | 1.566 | tr B4DI69 B4DI69_HUMAN         | 1.498 |
| sp P08311 CATG_HUMAN           | 1.59  | tr B5BUB5 B5BUB5_HUMAN         | 1.499 |
| tr Q53FB0 Q53FB0_HUMAN         | 1.601 | sp P27348 1433T_HUMAN          | 1.505 |
| tr Q53FB6 Q53FB6_HUMAN         | 1.609 | sp Q07960 RHG01_HUMAN          | 1.508 |
| sp P67936 TPM4_HUMAN           | 1.62  | sp P04080 CYTB_HUMAN           | 1.51  |
| tr B4DEX8 B4DEX8_HUMAN         | 1.622 | tr B4DEA6 B4DEA6_HUMAN         | 1.511 |
| sp P50461 CSRP3_HUMAN          | 1.622 | tr A8K1D2 A8K1D2_HUMAN         | 1.512 |
| tr Q3B874 Q3B874_HUMAN         | 1.65  | sp P07737 PROF1_HUMAN          | 1.514 |
| sp P51911 CNN1_HUMAN           | 1.651 | sp P08493 MGP_HUMAN            | 1.518 |
| tr W6A4U0 W6A4U0_HUMAN         | 1.661 | sp P0C0L5 CO4B_HUMAN           | 1.522 |
| tr Q6N093 Q6N093_HUMAN         | 1.664 | tr A0A087WZF1 A0A087WZF1_HUMAN | 1.523 |
| tr B4DL49 B4DL49_HUMAN         | 1.708 | tr B2R941 B2R941_HUMAN         | 1.535 |
| sp P18065 IBP2_HUMAN           | 1.765 | tr E5KN59 E5KN59_HUMAN         | 1.537 |
| tr H0YGX7 H0YGX7_HUMAN         | 1.793 | sp Q6EEV6 SUMO4_HUMAN          | 1.543 |
| tr A0A024QZX5 A0A024QZX5_HUMAN | 1.804 | tr A0A087WUS0 A0A087WUS0_HUMAN | 1.558 |
| sp Q8TAE6 PP14C_HUMAN          | 1.808 | sp P15121 ALDR_HUMAN           | 1.56  |
| tr H0Y5J4 H0Y5J4_HUMAN         | 1.857 | tr B4DVR4 B4DVR4_HUMAN         | 1.56  |
| tr A0A075B6R9 A0A075B6R9_HUMAN | 2.071 | tr A0A024RAF2 A0A024RAF2_HUMAN | 1.563 |
| tr H3BRN4 H3BRN4_HUMAN         | 2.089 | tr A2A2D0 A2A2D0_HUMAN         | 1.568 |
| tr C9JWC3 C9JWC3_HUMAN         | 2.149 | sp O75339 CILP1_HUMAN          | 1.568 |
| tr B7Z6G4 B7Z6G4_HUMAN         | 2.151 | tr Q53FB0 Q53FB0_HUMAN         | 1.572 |
| tr A0A5E4 A0A5E4_HUMAN         | 2.432 | tr B3KXB8 B3KXB8_HUMAN         | 1.579 |
| tr A0A024R884 A0A024R884_HUMAN | 2.603 | tr B4DUJ6 B4DUJ6_HUMAN         | 1.581 |
|                                |       | tr A0A0A0MSQ0 A0A0A0MSQ0_HUMAN | 1.588 |
|                                |       | tr A0A024QZJ6 A0A024QZJ6_HUMAN | 1.593 |
|                                |       | sp P12111 CO6A3_HUMAN          | 1.594 |
|                                |       | tr A0A075B6R9 A0A075B6R9_HUMAN | 1.609 |
|                                |       | tr C9JWC3 C9JWC3_HUMAN         | 1.61  |



|                                |       |
|--------------------------------|-------|
| sp P01903 DRA_HUMAN            | 1.614 |
| tr J3KTF8 J3KTF8_HUMAN         | 1.618 |
| tr Q7Z5G3 Q7Z5G3_HUMAN         | 1.638 |
| sp P02747 C1QC_HUMAN           | 1.643 |
| tr Q53FB6 Q53FB6_HUMAN         | 1.662 |
| sp Q15942 ZYG_HUMAN            | 1.669 |
| tr B3KUB8 B3KUB8_HUMAN         | 1.713 |
| tr B4DL49 B4DL49_HUMAN         | 1.728 |
| sp P05109 S10A8_HUMAN          | 1.739 |
| sp P00488 F13A_HUMAN           | 1.751 |
| sp P67936 TPM4_HUMAN           | 1.755 |
| sp O43707 ACTN4_HUMAN          | 1.772 |
| sp P35579 MYH9_HUMAN           | 1.784 |
| sp Q969G5 PRDBP_HUMAN          | 1.79  |
| tr B7Z832 B7Z832_HUMAN         | 1.799 |
| sp Q15746 MYLK_HUMAN           | 1.803 |
| tr B2R4M6 B2R4M6_HUMAN         | 1.817 |
| sp P12110 CO6A2_HUMAN          | 1.828 |
| tr A0A024QZX5 A0A024QZX5_HUMAN | 1.853 |
| sp Q01469 FABP5_HUMAN          | 1.854 |
| sp P04004 VTNC_HUMAN           | 1.864 |
| tr E9PIM6 E9PIM6_HUMAN         | 1.877 |
| sp P50461 CSRP3_HUMAN          | 1.883 |
| tr G3V1V0 G3V1V0_HUMAN         | 1.959 |
| tr A0A0A0MSV6 A0A0A0MSV6_HUMAN | 1.97  |
| tr G3V3X5 G3V3X5_HUMAN         | 1.996 |
| sp Q15417 CNN3_HUMAN           | 2.025 |
| tr A0A087X094 A0A087X094_HUMAN | 2.051 |
| sp P48061 SDF1_HUMAN           | 2.057 |
| tr B3KVC9 B3KVC9_HUMAN         | 2.071 |
| tr Q6IBG1 Q6IBG1_HUMAN         | 2.119 |
| tr A0A024R884 A0A024R884_H     | 2.16  |

|                                |       |
|--------------------------------|-------|
| UMAN                           |       |
| sp P31146 COR1A_HUMAN          | 2.232 |
| tr A0A5E4 A0A5E4_HUMAN         | 2.315 |
| tr B3KRN4 B3KRN4_HUMAN         | 2.343 |
| tr A0A087WUI4 A0A087WUI4_HUMAN | 2.402 |
| sp P18065 IBP2_HUMAN           | 2.402 |
| tr H0YGX7 H0YGX7_HUMAN         | 2.451 |
| tr X6RLJ0 X6RLJ0_HUMAN         | 2.638 |
| sp Q8N474 SFRP1_HUMAN          | 2.758 |
| tr B7Z6G4 B7Z6G4_HUMAN         | 2.772 |
| sp P51911 CNN1_HUMAN           | 2.881 |

---
